# Supplementary material for: Transport vehicle–mediated TREM2 PET maps myeloid cells in the glioblastoma microenvironment
Source: Research Square preprint supplement (doi:10.21203/rs.3.rs-8627080/v1), 2026-02-11
Supplement: Supplementary file 1 [file 20c08e6448843d5827fc3bf4.docx]

**Supplement to: Bartos et al. “Transport vehicle–mediated TREM2 PET maps myeloid cells in the glioblastoma microenvironment”**

**Content**

**Supplemental Figure 1:** Data quality control and differential gene expression across microglia subsets

**Supplemental Figure 2:** Stage-dependent variation in the cellular sources of the TSPO PET signal during tumor progression in SB28 glioblastoma mice.

**Supplemental Figure 3:** Extended analyses of TREM2 PET imaging in murine glioblastoma.

**Supplemental Figure 4:** Multiplex immunofluorescence of human glioblastoma shows high colocalization of TREM2 with immune cells but not with tumor cells.

**Supplemental Figure 5:** Extended analyses of human TREM2 PET imaging.

**Supplemental Figure 6:** Immunohistochemistry of human tumor tissue.

**Supplemental Figure 7:** Comparison of TREM2 PET with FET and TSPO PET in a subset of patients.

**Supplement References**

**Supplemental Fig 1**

**
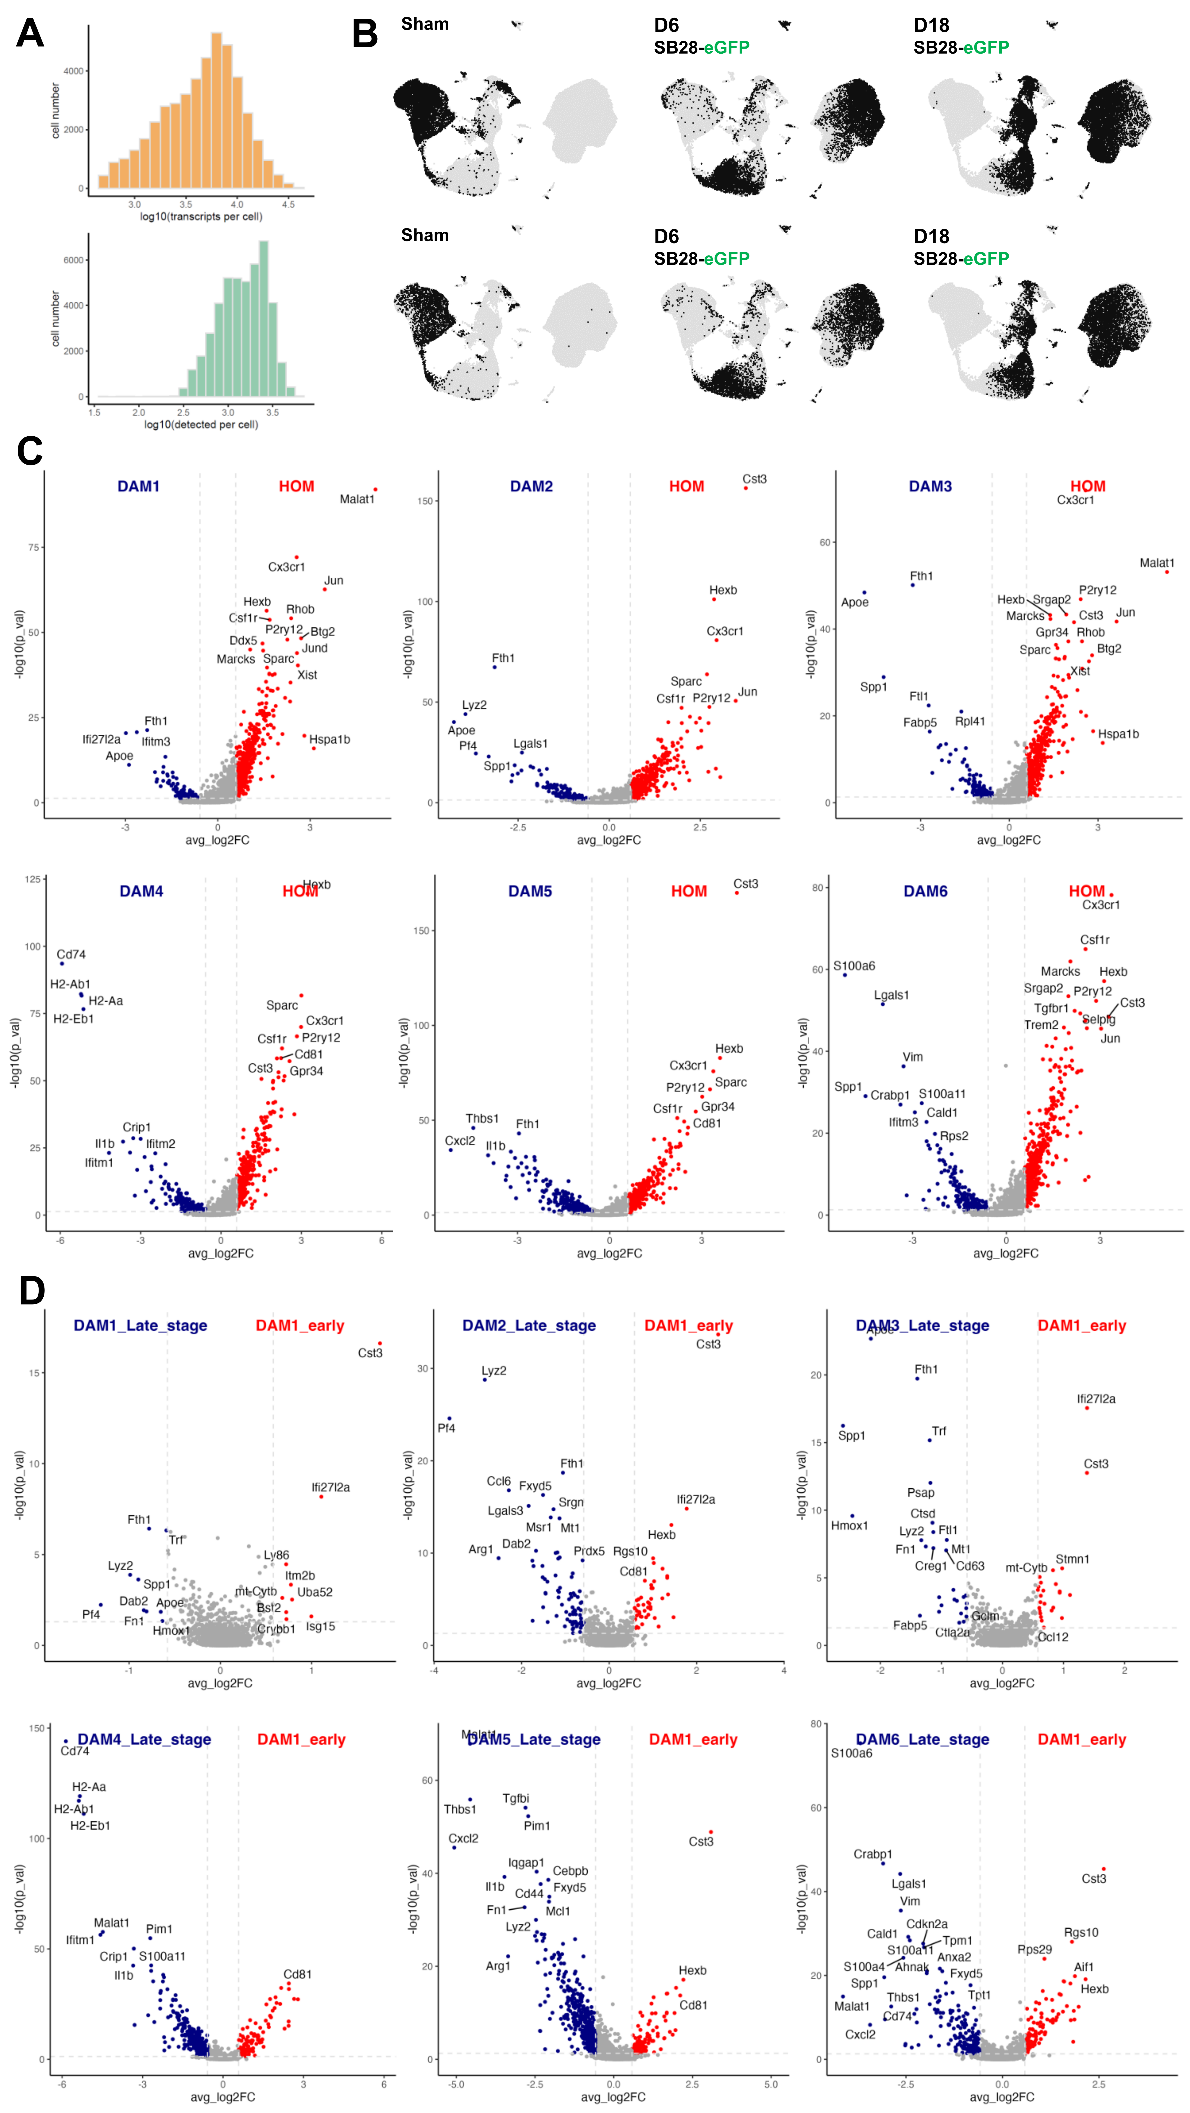
**

**Supplemental Figure 1: Data quality control and differential gene expression across microglia subsets**

(**A**) Histogram showing the transcript counts (top) and feature counts (bottom) of all cells identified by scRNA-seq.

(**B**) All individual sample were projected onto the uniform manifold approximation and projection (UMAP). UMAPs show n=2 replicates per condition.

(**C**) Volcano plot showing the different expression gene between all disease associated microglia/macrophage clusters (DAMs: top left: DAM1; top middle: DAM2; top right: DAM3; bottom left: DAM4; bottom middle: DAM5; bottom right: DAM6) and homeostatic microglia (HOM).

(**D**) Volcano plot showing the different expression gene between all DAM clusters (top left: DAM1; top middle: DAM2; top right: DAM3; bottom left: DAM4; bottom middle: DAM5; bottom right: DAM6) from late-stage tumor and DAM1 in early-stage tumor.

**Supplemental Figure 2**


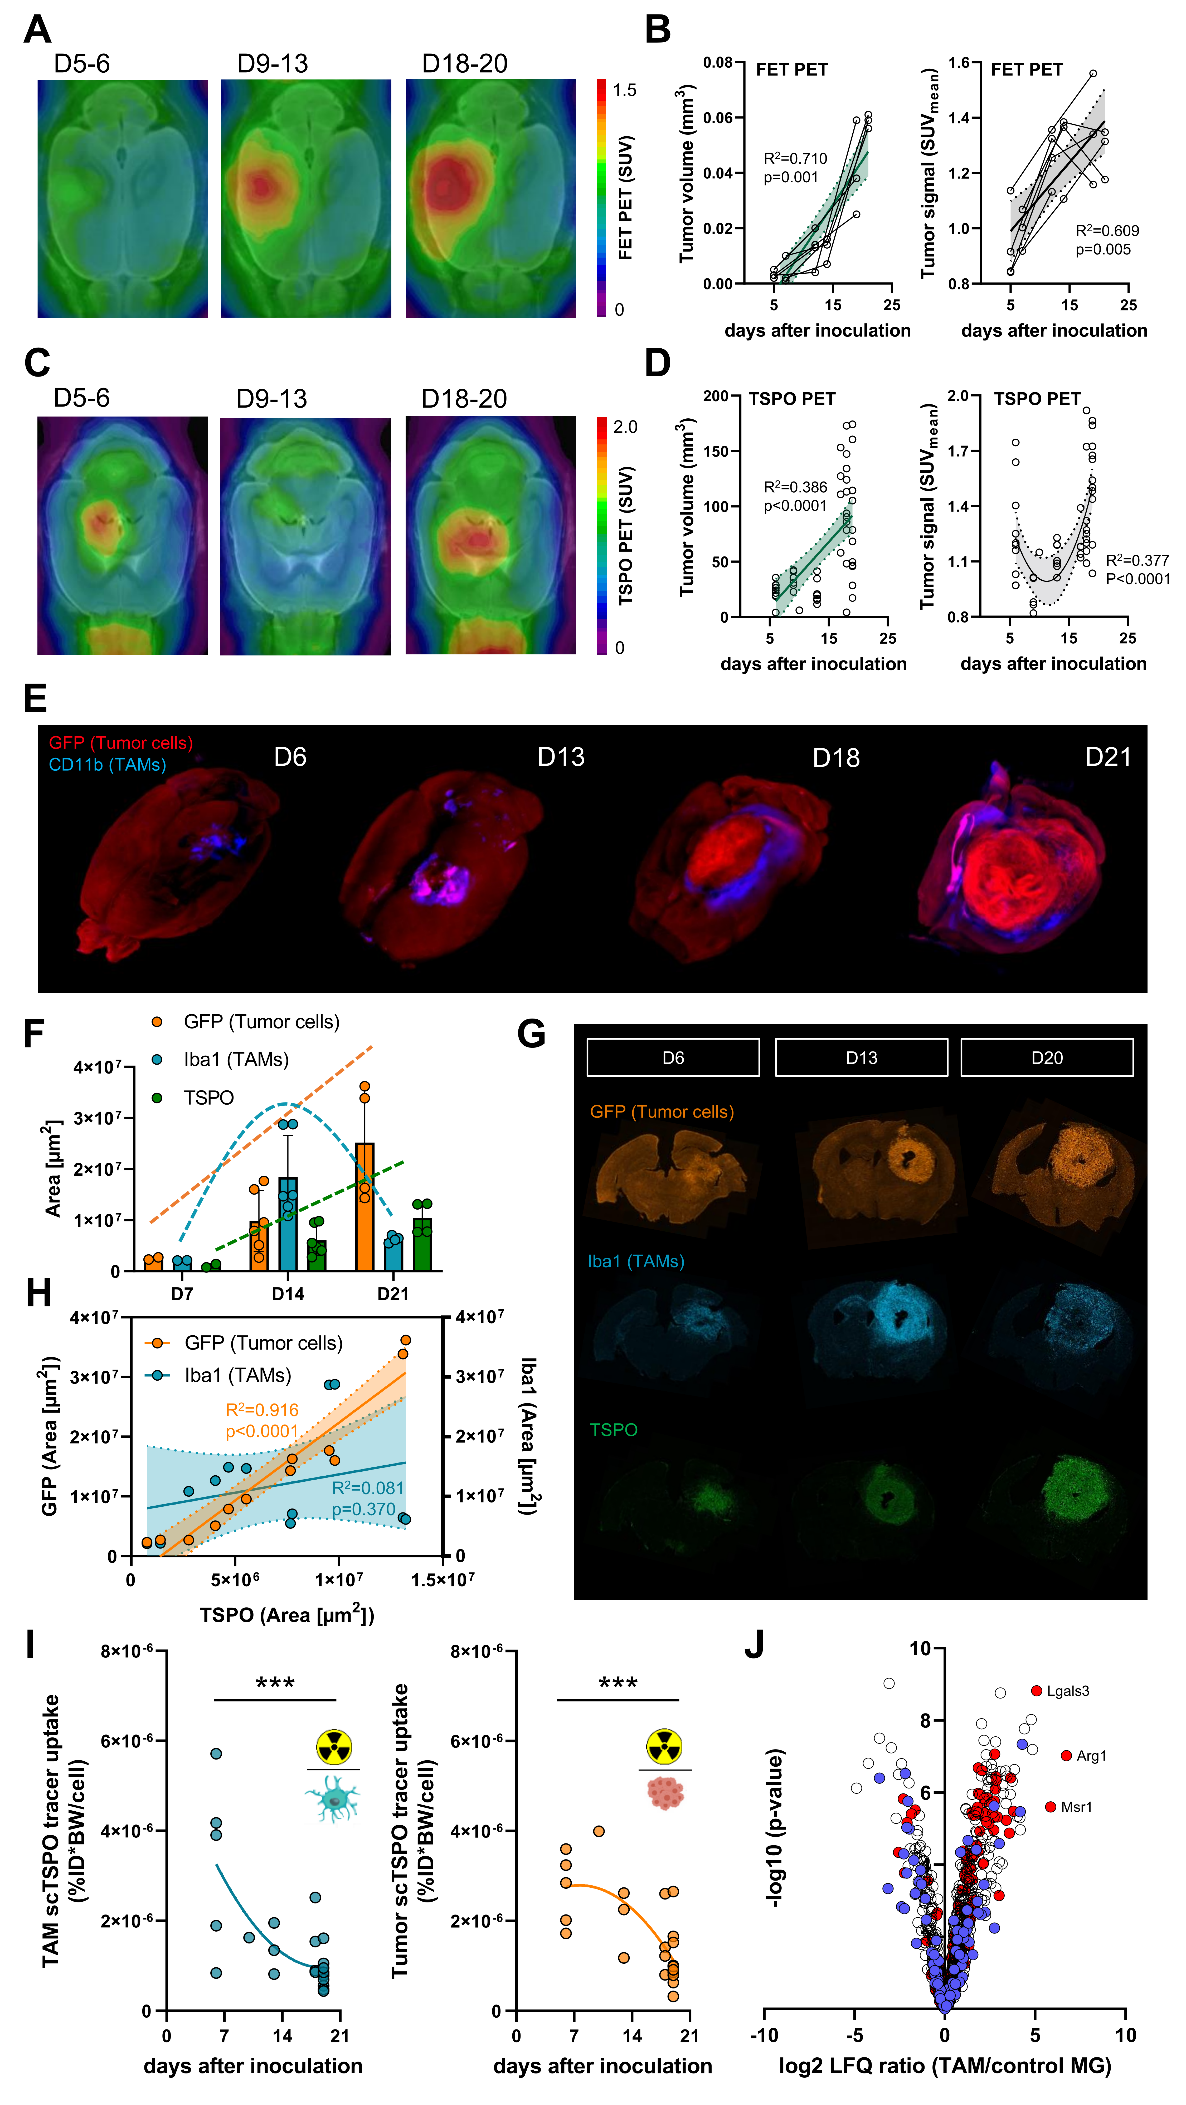


**Supplemental Figure 2: Stage-dependent variation in the cellular sources of the TSPO PET signal during tumor progression in SB28 glioblastoma mice.**

(**A**) Longitudinal FET PET demonstrates a time-dependent increase in both tumor size and FET PET signal intensity. Group average images of early- (D5-6, n=7), middle- (D9-13, n=7) and late-stage (D18-20, n=6) SB28 mice are displayed upon an MRI template in the axial plain. D=day, SUV=standardized uptake value.

(**B**) Quantification of tumor volumes (left) and PET signals (right) using longitudinal FET PET imaging in SB28 glioblastoma mice. Linear fit of the regression was used.

(**C**) TSPO PET group average images of early- (D5-6; n=10), middle- (D9-13; n=14) and late-stage (D18-20; n=26) SB28 tumor mice are displayed upon an MRI template in the axial plain. D=day, SUV=standardized uptake value.

(**D**) TSPO PET imaging of SB28 mice at different time points demonstrates an increase of tumor volumes over time, alongside with a U-shaped function of TSPO PET signal intensities during tumor progression. Linear fit of the regression was used for TSPO PET tumor volumes, quadratic fit of the regression was used for TSPO PET signals.

(**E**) 3-dimensional histology using light sheet microscopy of whole brains of SB28 tumor mice illustrates the abundance of TAMs (blue, CD11b+) and tumor cells (dark red, GFP+) during tumor progression. Each image represents the brain of a single mouse sacrificed at different time-points after tumor inoculation as displayed above. D=day.

(**F**) Immunofluorescence in SB28 mice at different time-points (D7, n=1; D14, n=3; D21, n=2) reveals a continuous increase in the area of tumor cells (GFP, orange) and TSPO expression (green), whereas the area of TAMs (Iba1, blue) follows an inverse U-shaped trajectory. N=2 slices were analyzed per animal. Dashed lines depict trajectories of the area of tumor cells, TAMs and TSPO over time. D=Day.

(**G**) Representative overview images of individual SB28 glioblastoma-bearing mice at different time-points. Tumor cells (GFP, orange), TAMs (Iba1, blue) and TSPO (green) are illustrated for one mouse of each early- (D6), middle- (D13) and late-stage (D20). Coronal slices are shown.

(**H**) Across all time points, the area of TSPO in immunofluorescence (n=12 slices of n=6 animals) shows a high correlation with the area of tumor cells (GFP, orange) but no correlation with the area of TAMs (Iba1, blue). Simple linear regression.

(**I**) Cell sorting after *in vivo* tracer injection (i.e. scRadiotracing) reveals decreasing TSPO tracer uptake in single cells of both tumor cells and TAMs during tumor progression. Unpaired Student’s t-test for day 6 (n=5) vs. day 18 (n=12). ***p<0.001.

(**J**) Comparison of the proteome of CD11b(+) immune cells of late-stage SB28 tumors and control microglia from therapy-naïve wild-type mice shows a strong immunosuppressive phenotype in late-stage tumors, exemplarily showing high protein levels of Arg1, Cd74 or Tnfrsf14. Proteins with related genes that were previously reported as highly expressed in immunosuppressive condition1 (>2-fold) are labeled in red whereas low expression in immunosuppressive condition (<50%) are labeled in blue. MG=microglia.

**Supplemental Figure 3**

**
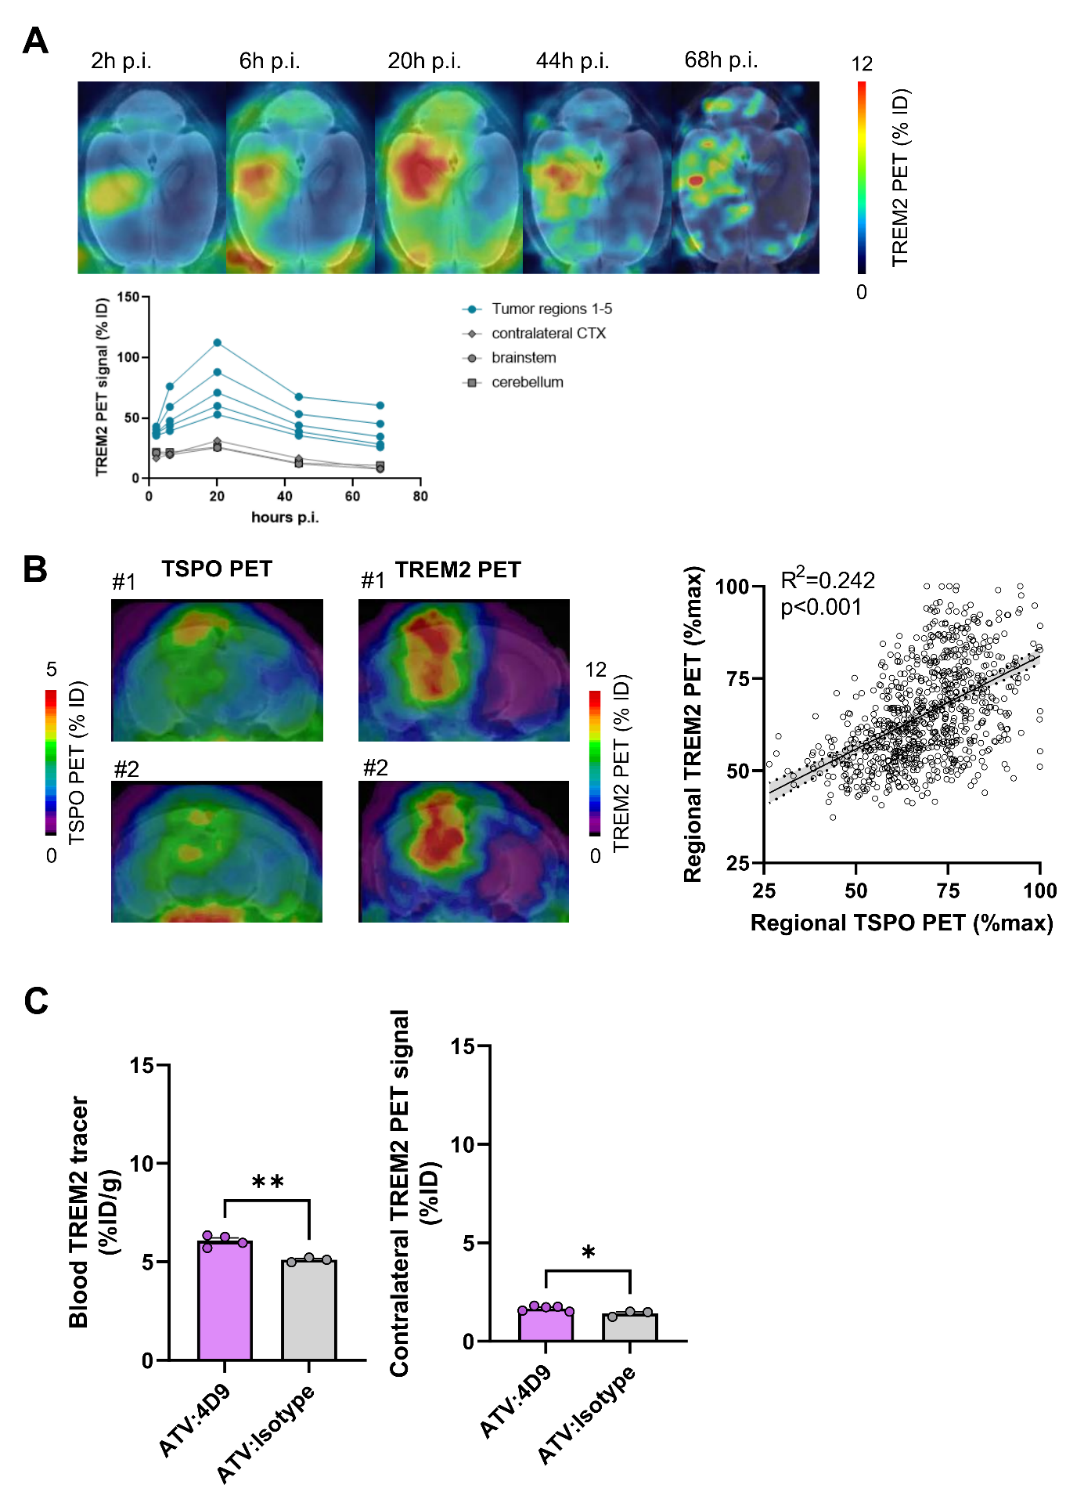
**

**Supplemental Figure 3: Extended analyses of TREM2 PET imaging in murine glioblastoma.**

(**A**) Repetitive TREM2 PET imaging (2–68h p.i.) in one single mouse revealed progressive signal increases in distinct brain and tumor regions, with peak uptake at 20h p.i., followed by gradual washout. This kinetic profile is consistent with the anticipated dynamics of a transport vehicle antibody PET tracer2. PET images are shown in the axial plain upon an MRI template. CTX=cortex. ID=injected dose.

(**B**) In four mice undergoing both TREM2 PET (day 9) and TSPO PET (day 8) imaging, regional correlation analysis revealed limited spatial concordance between the two tracers. Representative coronal PET images of two mice are displayed over an MRI template. ID=injected dose. Simple linear regression.

(**C**) Increase in *ex vivo* TREM2 tracer blood levels as well as *in vivo* TREM2 PET signals in the contralateral hemisphere in mice treated with the TREM2 agonist ATV:4D9 compared with the ATV isotype control at day 7 after inoculation. Imaging was performed two days after treatment (day 9). ID=injected dose. Unpaired Student’s t-tests. *p < 0.05, **p < 0.01

**Supplemental Figure 4**


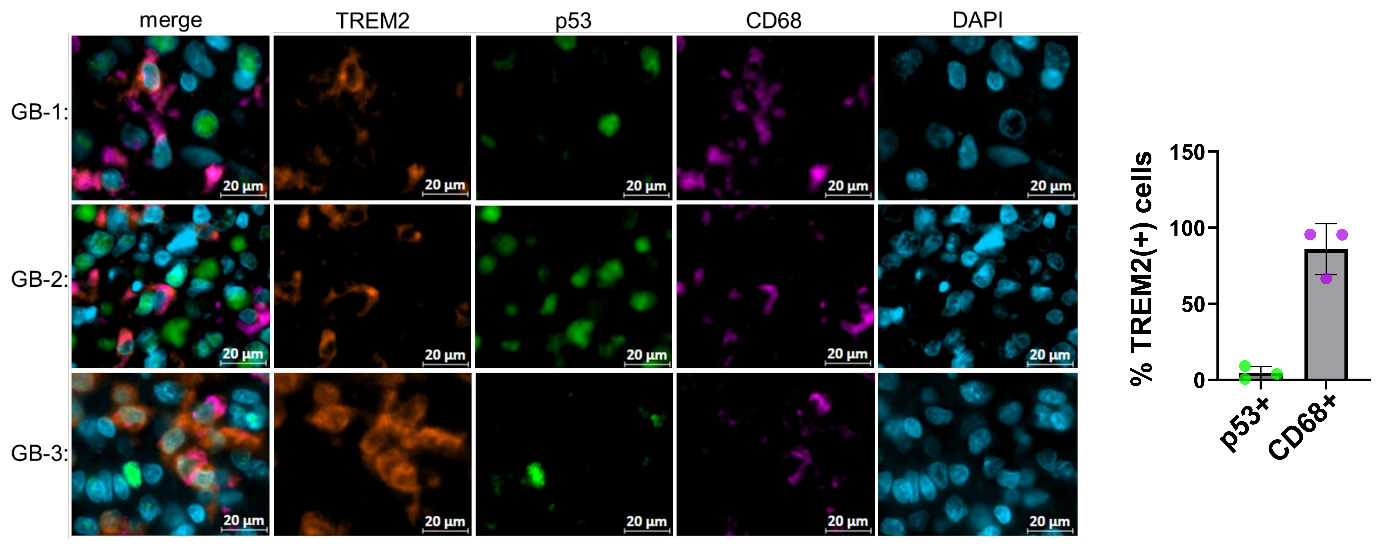


**Supplemental Figure 4: Multiplex immunofluorescence of human glioblastoma shows high colocalization of TREM2 with immune cells but not with tumor cells.**

Representative images of multiplex immunofluorescence staining of three glioblastoma samples showing TREM2 (orange), CD68 (pink), and p53 (green) with nuclear counterstaining by DAPI (blue). TREM2 expression was largely absent in p53(+) tumor cells, whereas nearly all CD68(+) tumor-associated TAMs also showed strong TREM2-positivity. Quantitative analysis confirmed these observations, revealing almost no TREM2(+) cells within the p53(+) tumor cell fraction, while the majority of CD68(+) TAMs were TREM2(+).

**Supplemental Figure 5**


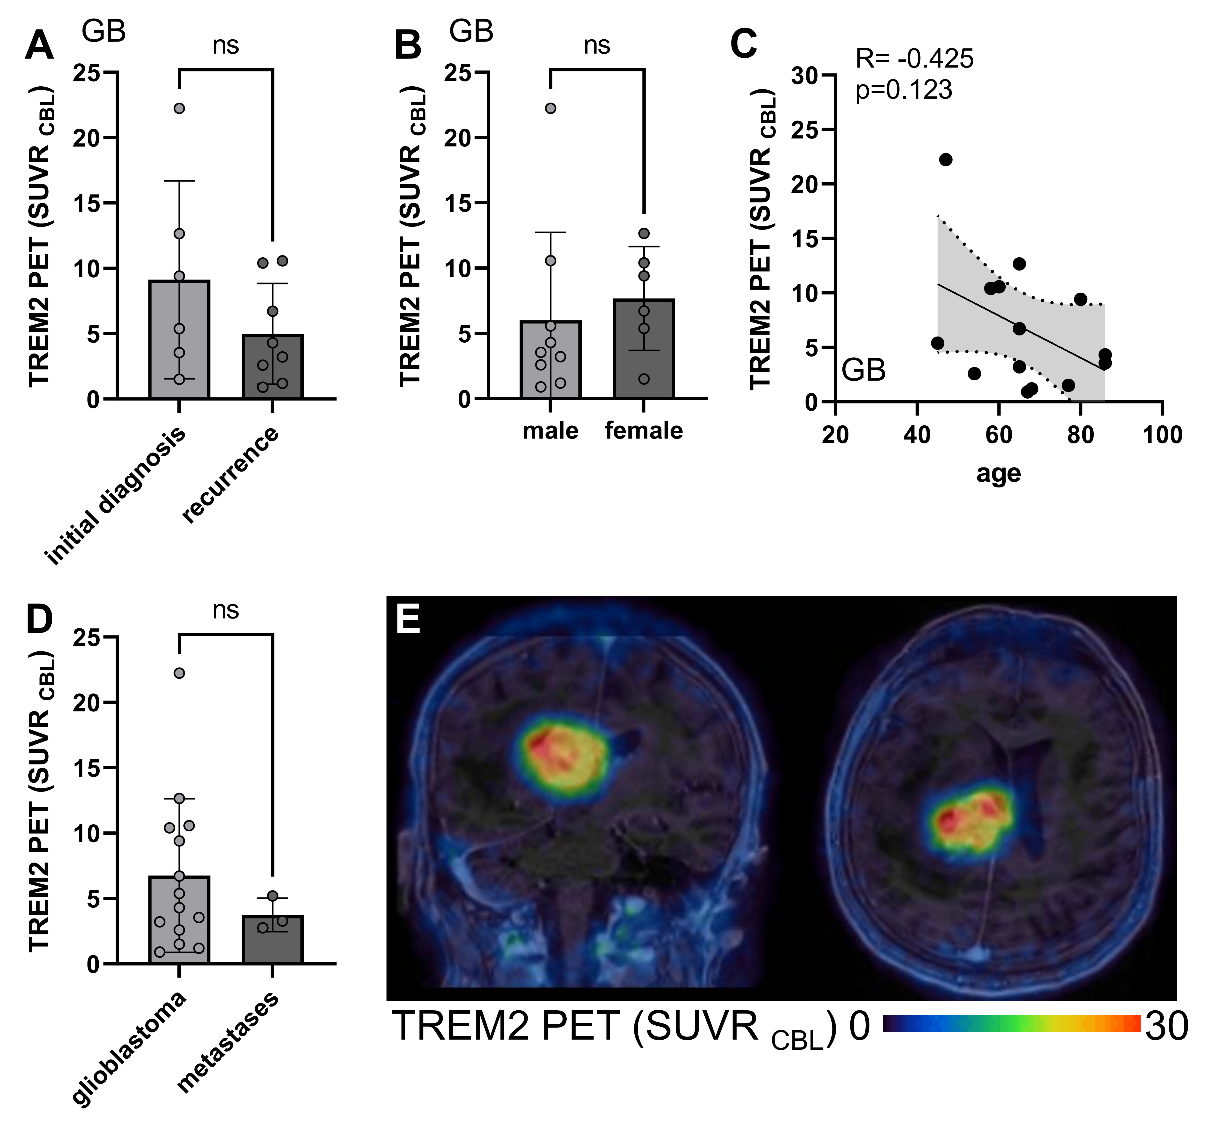


**Supplemental Figure 5: Extended analyses of human TREM2 PET imaging.**

(**A**) Quantification of TREM2 PET signals (within ceMRI+ tumor lesions) in comparison of patients with an initial diagnosis of glioblastoma (GB, n=6) and patients with recurrence of glioblastoma (n=8) shows no significant difference between both groups. Unpaired Student’s t-test. ns=not significant. SUVR=standardized uptake value ratio with cerebellar white matter reference (CBL).

(**B**) Quantification of TREM2 PET signals (within ceMRI+ tumor lesions) in comparison of female (n=9) and male (n=6) patients with glioblastoma (GB) shows equal distribution across both groups. Unpaired Student’s t-test. GB=glioblastoma. ns=not significant. SUVR=standardized uptake value ratio with cerebellar white matter reference (CBL).

(**C**) Correlation of TREM2 PET signals in patients with glioblastoma (n=14) with age shows a trend towards lower TREM2 PET signals at higher age. Simple linear regression. SUVR = standardized uptake value ratio with cerebellar white matter reference (CBL).

(**D**) Quantification of TREM2 PET signals in comparison of patients with glioblastoma (n=14) against brain metastases (n=3) shows no significant difference between both groups. Unpaired Student’s t-test. ns=not significant. SUVR=standardized uptake value ratio with cerebellar white matter reference (CBL).

(**E**) Strong TREM2 PET signal in a patient with initial diagnosis of CNS lymphoma. TREM2 PET image is shown in the coronal and axial plain upon the individual ceMRI. SUVR=standardized uptake value ratio with cerebellar white matter reference (CBL).

**Supplemental Figure 6**


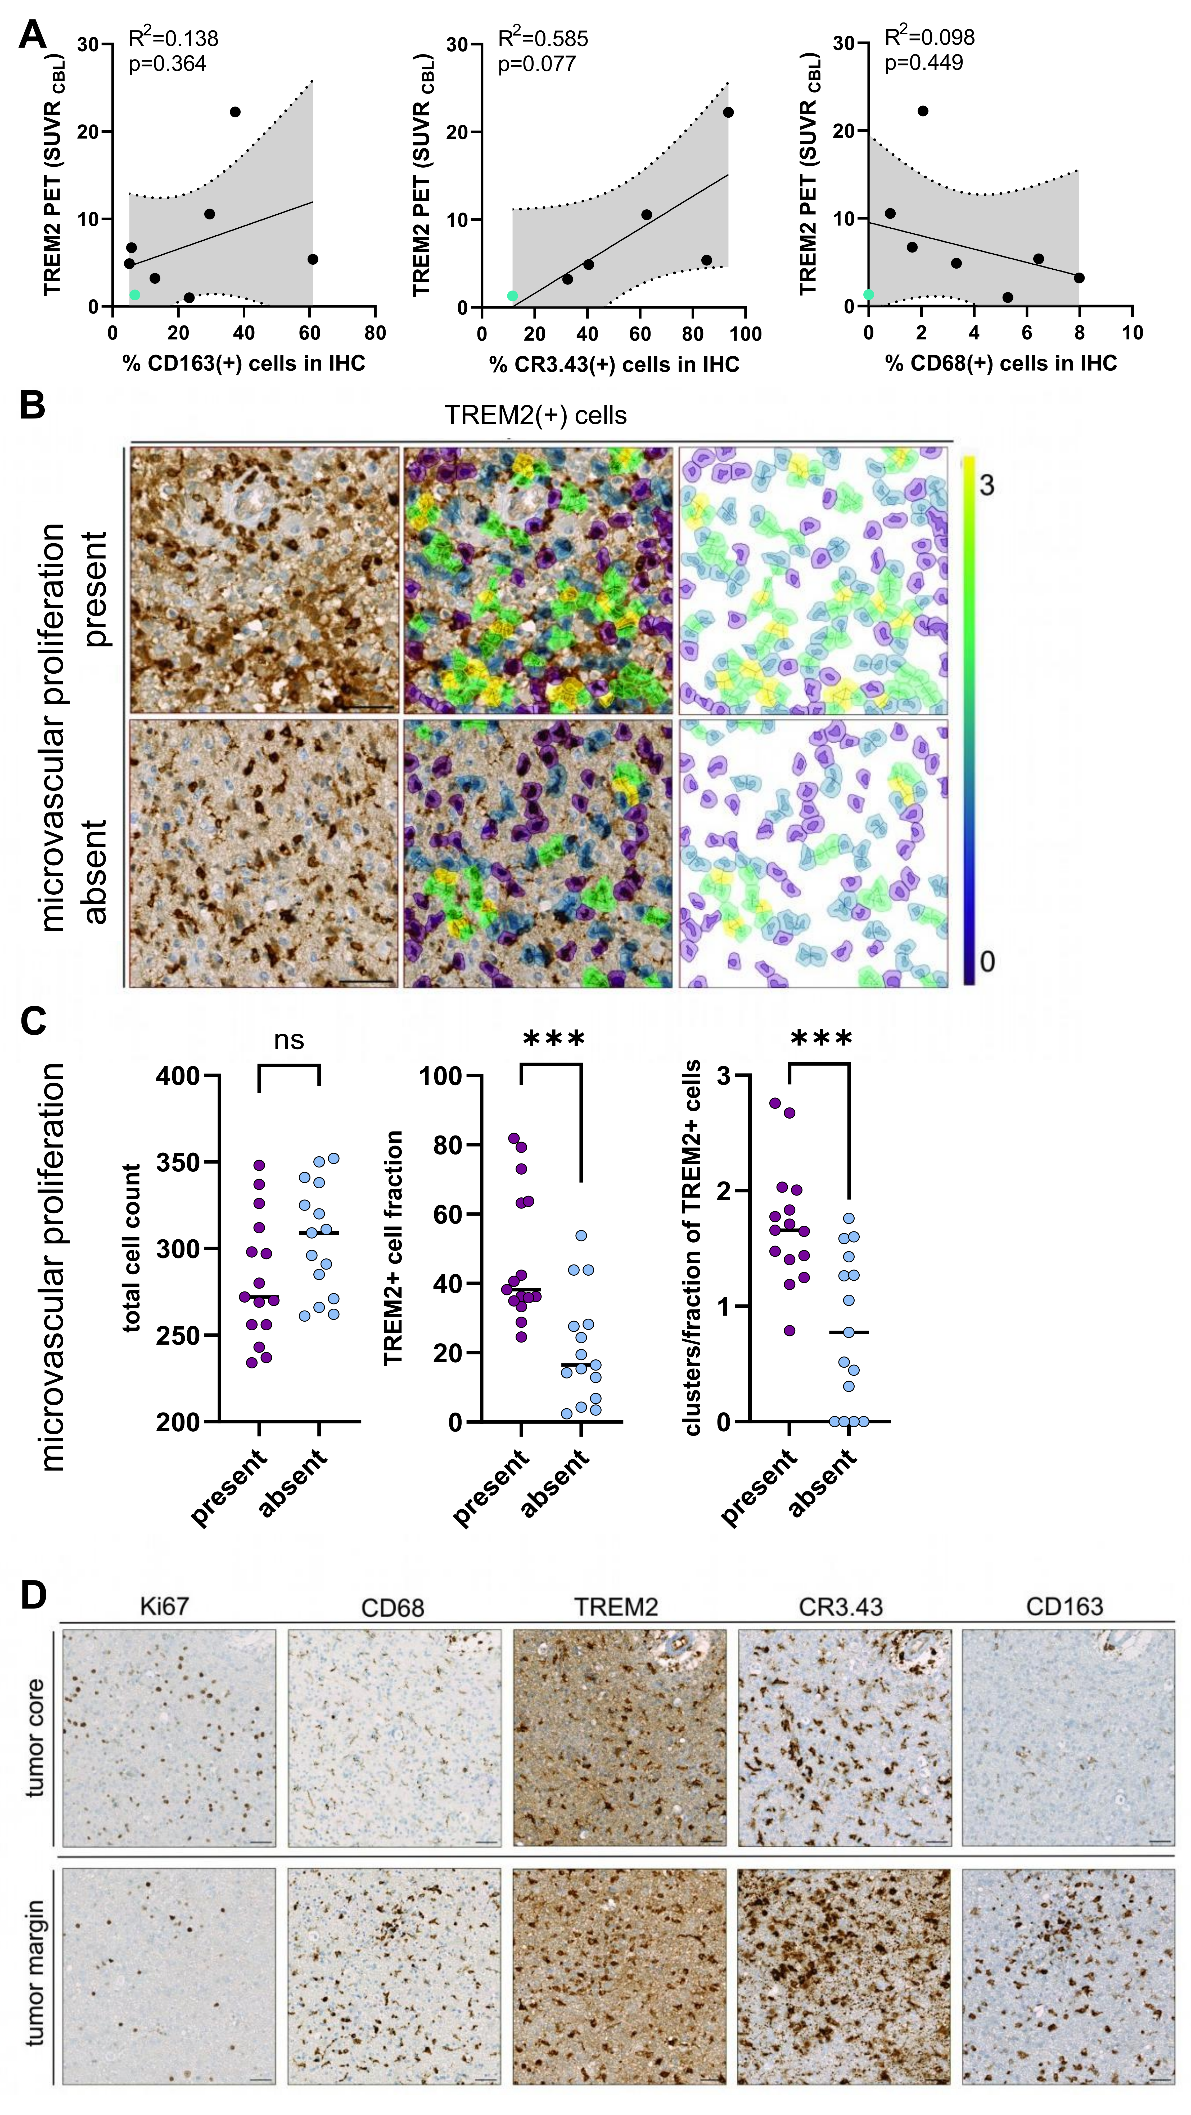


**Supplemental Figure 6: Immunohistochemistry of human tumor tissue.**

(**A**) Correlation between tumor TREM2 PET signal (assessed in ceMRI+ areas) and immunohistochemical quantification of CD163(+), CR3.43(+), and CD68(+) immune cells in matched tumor tissue from the same patients with glioblastoma as analyzed in **Fig. 6F**. CR3.43 was not available in two tissue samples. Turquoise dot indicates a brain tissue sample which was located adjacent to the tumor. Black dots indicate tumor tissue. Simple linear regression. SUVR=standardized uptake value ratio with cerebellar white matter reference (CBL).

(**B**) For TREM2(+) macrophages single-cell coordinates from image segmentation were used to generate a Delaunay triangulation analysis, defined by neighboring cells and spatial density clusters in tumor areas with present (upper row) or absent (lower row) microvascular proliferation in three patients with newly diagnosed glioblastoma. Representative images show TREM2 immunohistochemistry (left), the corresponding Delaunay cluster analysis (right) and the image overlay (middle). The color scale bar illustrates the number of neighboring cells based on a centroid distance of 15µm. Bars 50 µm.

(**C**) Analysis of i) total cell density, ii) TREM2(+) cell density and iii) TREM2(+) cell clustering in tumor areas with present or absent microvascular proliferation from three patients. Dot plot graphs show n = 5 representative tissue regions analyzed per condition per patient. Mann-Whitney test. ns=non-significant, ***p < 0.001

(**D**) Immunohistochemistry of one exemplified patient who received tumor resection after TREM2 PET imaging (#11 in **Fig. 6A**) shows higher positivity of TREM2 and myeloid cell markers in the tumor margin compared to the tumor core, confirming higher TAM abundance in the infiltration zone. Bars 50 µm.

**Supplemental Figure 7**


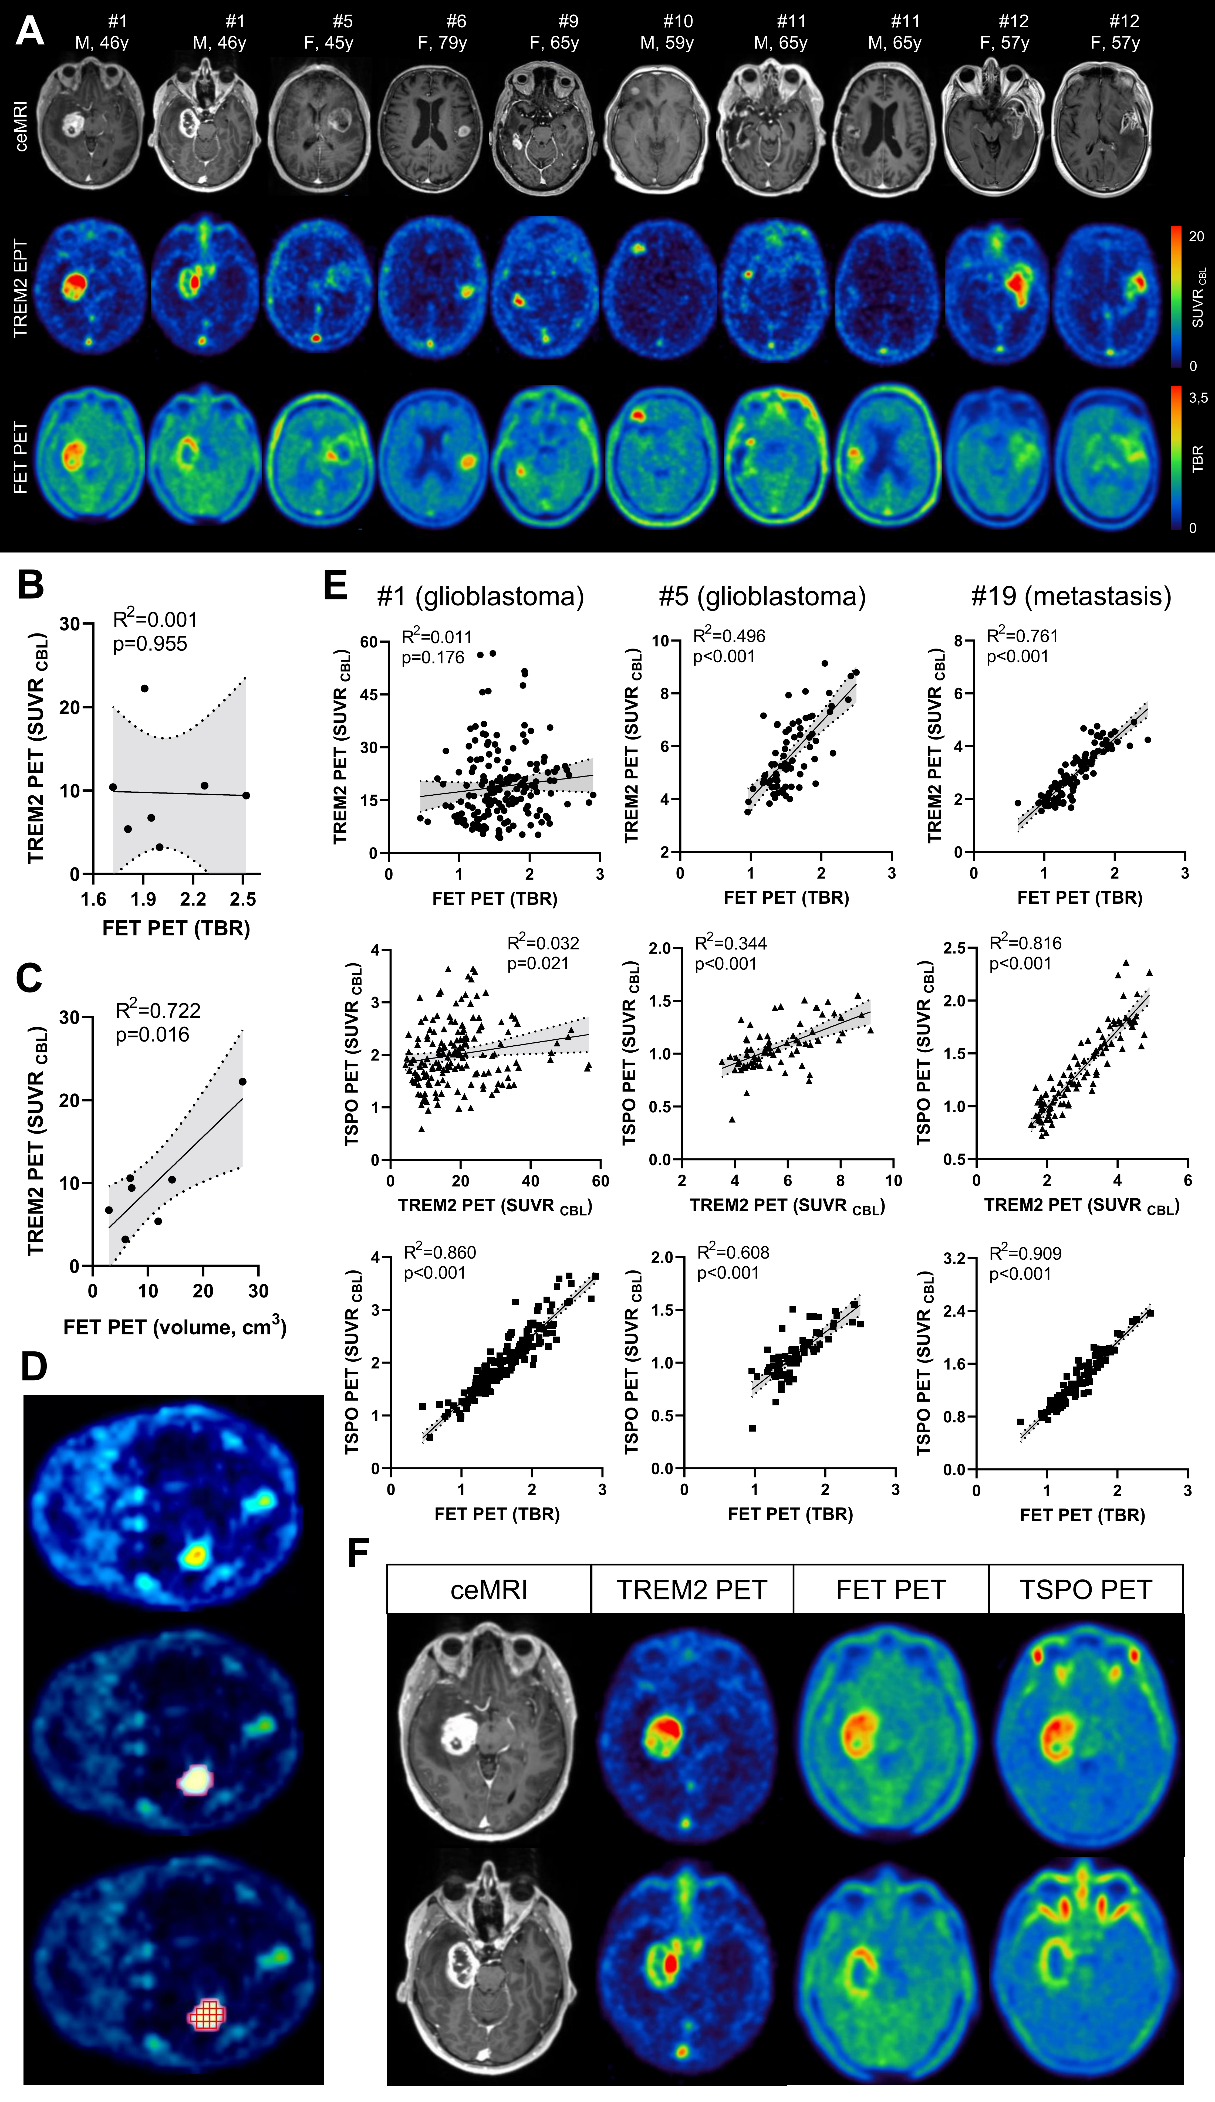


**Supplemental Figure 7: Comparison of TREM2 PET with FET and TSPO PET in a subset of patients.**

(**A**) Subset of n=7 patients with glioblastoma who received FET PET imaging in addition to TREM2 PET. Exemplary images of contrast enhanced MRI (ceMRI, upper row), TREM2 PET (middle row) and FET PET (lower row) are shown in the axial plain. Interestingly, TREM2 PET signal hotspots did not always colocalize with areas of high contrast enhancement or FET PET signals. y=years. M=male. F=female. SUVR=standardized uptake value ratio with cerebellar white matter reference (CBL).

(**B, C**) No correlation was observed between tumor TREM2 PET signal intensity (assessed in ceMRI+ areas) and tumor amino acid metabolism as expressed by FET PET signal intensity. Contrary, TREM2 PET signal intensity correlated with the biological tumor volume as determined by FET PET positive area. SUVR=standardized uptake value ratio with cerebellar white matter reference (CBL). TBR=tumor-to-background-ratio. Simple linear regression.

(**D**) Schematic illustration of the voxel-wise PET analysis. The tumor was segmented using a 70% maximum threshold (middle) and subsequently subdivided into small cubic VOIs centered around individual tumor voxels (bottom).

(**E**) Voxel-wise correlation of TREM2 PET with FET PET and TSPO PET in three individual patients (#1, #5, and #19 in **Fig. 6A**). TREM2 PET showed only moderate regional concordance with TSPO PET and FET PET. Contrary, a strong correlation was observed between FET PET and TSPO PET, consistent with tumor cell dominance of TSPO PET signals in malignant brain tumors. Notably, the highest agreement between TREM2 and TSPO PET was observed in the one patient with brain metastasis. SUVR=standardized uptake value ratio with cerebellar white matter reference (CBL). TBR=tumor-to-background-ratio. Simple linear regression.

(**F**) Representative case (#1 in **Fig. 6A**) illustrating high regional agreement of TSPO and FET PET hotspot regions, whereas TREM2 PET signal enhancement localized to a separate hotspot.

**References**

1 Maire, C. L. *et al.* Glioma escape signature and clonal development under immune pressure. *J Clin Invest* **130**, 5257-5271 (2020). <https://doi.org/10.1172/JCI138760>

2 van Lengerich, B. *et al.* A TREM2-activating antibody with a blood-brain barrier transport vehicle enhances microglial metabolism in Alzheimer's disease models. *Nat Neurosci* (2023). <https://doi.org/10.1038/s41593-022-01240-0>
